# Supplementary material
Source: PubMed Central journal article supplement (PMC3170153)
Supplement: supp_mcr111_mcr111supp.pdf [file supp_mcr111_mcr111supp.pdf]

## SUPPLEMENTARY DATA

TABLE S1. List of primers used in this study. D represents nucleotides A, G and T. N represents A, C, G and T. R represents A and G. V represents A, C and G. W represents A and T. Y represents C and T.

| Primer name          | Sequence                       | Purpose          |
|----------------------|--------------------------------|------------------|
| TfCRP1g44F           | TTGTCCCCCTTGCTTCTGC            | Cloning          |
| TfCRP1degenerateR    | TTTTCAGAACACACRCAVTCNCC        | Cloning          |
| TfCRP1degenerateF    | GTCCCCYTRGCDTCWGCD             | Cloning          |
| TfCRP1g814R          | TTTTCAGAACACACACAATCTCC        | Cloning, 5' RACE |
| TfCRP1g776R          | GAGTCGAAGCATAACCAATCGCAGTCTCC  | 5' RACE          |
| TfCRP1cDNA55F        | GCTTCTGCAGGTCAAATCCACCTGAGC    | 3' RACE          |
| TfCRP1g679F          | GAGCAACTAAGGTATGTGGAATTTTGCGAC | 3' RACE          |
| TcCRP1g23F           | CTATCTTTCTTGTGTTTTGGTCCTCGTCC  | RT-PCR           |
| TcCRP1cDNA200R       | CACAATCTCCTCTTGTCCAAAGAGTCG    | RT-PCR           |
| GAPDH-Frd3           | AATGATAGATTTGGAATTGTTGAG       | RT-PCR           |
| GAPDH-Rvs3           | GCACTTTACCAACAGCCTTAG          | RT-PCR           |
| CACC-B-TcCRP1-noSP-F | CACCGGATCCGGTCAAATCCACCTGAG    | Cloning          |
| TfCRP1-Xho1-R        | CTCGAGTTAATTTCTTTTTCTTTTCAGAAC | Cloning          |

FIG. S1. Nucleotide sequences of full-length TfCRP1 and TcCRP1 cDNA. Upper-case letters represent sequences in the exons, and lower-case letters are those in the intron. Asterisks represent conserved nucleotides.

|        |     |                                                                                                      |     |
|--------|-----|------------------------------------------------------------------------------------------------------|-----|
| TfCRP1 | 1   | ATGAATTACTCTAAAATTGTTGCTATCTTTCTTGTTTTGGTCCTTGTCCCCCTTGCTTCTGCAGgtacattcactatacaactatcatataatattcat  | 100 |
| TcCRP1 | 1   | ATGAATTGCTCTAAAATTATGGCTATCTTTCTTGTTTTGGTCCTCGTCCCCCTTCTTCTGCAGgtacattcact-----tgtcatatcatatacat     | 93  |
|        |     | ***** * ***** * ***** * ***** * ***** * ***** * ***** * *****                                        |     |
| TfCRP1 | 101 | tagtacctctatgtgtaaccgatagactaacctgttcttttgacttt---cgttataattttaatttaataacttcctacatgttaaaaatttcaat    | 196 |
| TcCRP1 | 94  | tagtaattctatatgttaacagat-----gccctttttttgtactttaacacgtgatattttaattctataactttatacatgttaaaaattttaat    | 187 |
|        |     | ***** ***** ***** * ** ** ***** ***** ***** ***** ***** ***** *****                                  |     |
| TfCRP1 | 197 | agagtagtggtgcgacataattaggcatattaggcaacagaaagttattatctcttaaggaattaggcaaacacttattagatagatagaatcatt     | 296 |
| TcCRP1 | 188 | ggagttgtggtgcgacttaattacgcata---ggcaacataaaattattacgtctcttaaggaattaggcaa--cacttattagatagatagaatcatt  | 282 |
|        |     | **** ***** ***** ***** ***** ***** ***** ***** ***** ***** ***** *****                               |     |
| TfCRP1 | 297 | atatattaaattgatthtaacacatctaataacaaaaatggatataaacttcttctgcagttatcaagaacactcctccttattttgtcataaatttaa  | 396 |
| TcCRP1 | 283 | atatattaaattgatthtaacacatctaataacaaaaacggacataaattcttctatagttatcaagaacactcctcct--tattttgtcataaatttaa | 380 |
|        |     | ***** ***** ***** ***** ***** ***** ***** ***** ***** ***** ***** *****                              |     |
| TfCRP1 | 397 | aaattgtttgtaaacaccatctcaaaggagtattgagttgattattaagaaaacacctgccacaagaattcattgcttttagggaaatgatcctcatg   | 496 |
| TcCRP1 | 381 | aaattgtagtgtaacaacatctctaaggagtagtgagttgattattaagaggacacttgccacaaaaaattattgcttttaggtatgatcctcatg     | 480 |
|        |     | ***** ***** ***** ***** ***** ***** ***** ***** ***** * ***** *****                                  |     |

TfCRP1 497 agccaaacctattaatatatacccacgtaatttctgcagcaagtactatttgaattcattgcaatataatTTTTgttacgaatttggaaatTTtatt 596

TcCRP1 481 aggcaaacctattactgcgtgcctacgtaatttatccaacgagtactatatgaattcataacaatatatTTTTgtcacgaatttggaaaatTTcatc 580

\*\* \*\*\*\*\* \* \* \*\* \*\*\*\*\* \* \*\* \* \*\*\*\*\* \*\*\*\*\* \*\*\*\*\* \*\*\*\*\* \*\*

TfCRP1 597 aatTTTaaactaaaacagGTGAAATTCACCTGAGCAACTAAGGTATGTGGAATTTTGC GACTTATGGAGTGCCGATTTTAGTGGCAGCTGTGGTGATT 696

TcCRP1 581 aatTTTaaattaaaacagGTCAAATTCACCTGAGCCACTAAGGTATGTGGAATTTTGC GACTTATTCAGTGGGGATTTTAGTGGCAGCTGTGATGAGT 680

\*\*\*\*\* \*\*\*\*\* \*\*\*\*\* \*\*\*\*\* \*\*\*\*\* \*\*\*\*\* \*\*\*\*\* \*\*\*\*\* \*\*\*\*\* \*

TfCRP1 697 TATGCAAAAAGAAATGGGGACCAAATTTTGTGGAGACTGCGATTGGTATGCTTCGACTCTTTGGACAAGCGGAGATTGTGTGTGTTCTGAAAAGAAAA 796

TcCRP1 681 TATGCAAAAAGAAACGGGGACCAAATTTTGTGGAGACTGCGATTGGTATGCTTCGACTCTTTGGACAAGAGGAGATTGTGTGTGTTCTGAAAAGAAAA 780

\*\*\*\*\* \*\*\*\*\* \*\*\*\*\* \*\*\*\*\* \*\*\*\*\* \*\*\*\*\* \*\*\*\*\* \*\*\*\*\* \*\*\*\*\* \*

TfCRP1 797 AGAAATAA 804

TcCRP1 781 AGAAATAA 788

\*\*\*\*\*
